# Supplementary material
Source: PubMed Central journal article supplement (PMC8000345)
Supplement: pnas.2023988118.sapp.pdf [file pnas.2023988118.sapp.pdf]

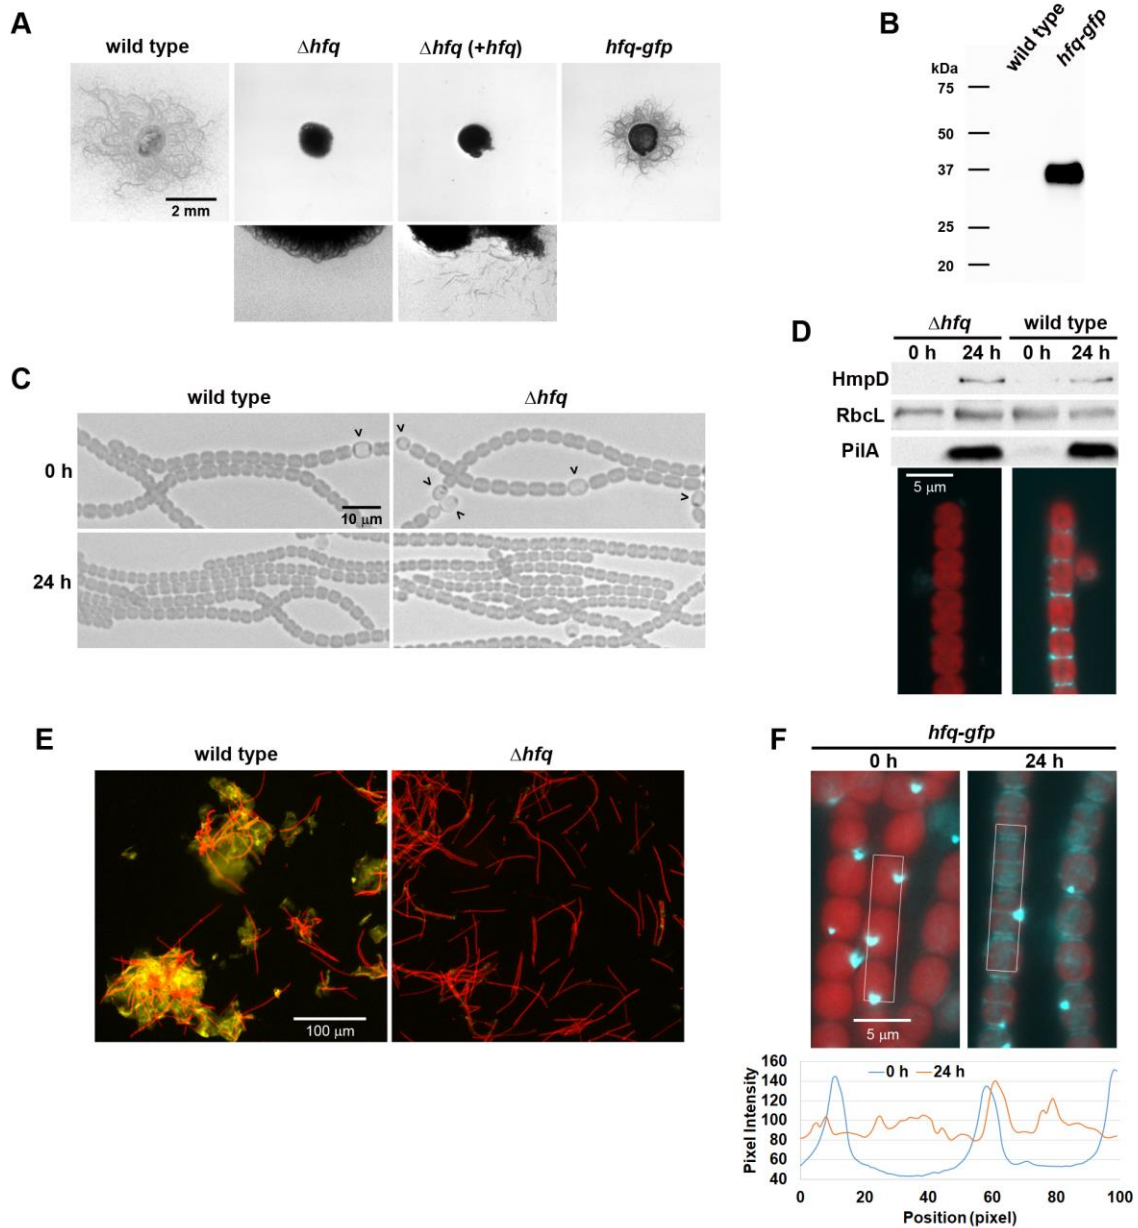

1

2 **Figure S1.** Characterization of *hfq*-deletion and *hfq-gfp* strains. **(A)** Plate motility assays of the wild type,  
 3  *$\Delta hfq$* , *hfq-gfp*, and complemented  *$\Delta hfq$*  strains. **(B)** Immunoblot analysis of the wild type and *hfq-gfp*  
 4 strains with an  $\alpha$ -GFP antibody. **(C)** Light micrographs of the filament morphology for the wild type and  
 5 *hfq*-deletion strains at 0 h and 24 h post hormogonium induction. Carets indicate the presence of  
 6 heterocysts attached to filaments. Hormogonia can be distinguished from vegetative filaments by the  
 7 absence of heterocysts, smaller cell size, and presence of tapered cells at the filament termini. **(D)**

8 Immunoblot analysis of cellular HmpD, PilA, and RbcL, and immunofluorescence analysis of extracellular  
9 PilA in the wild type and  $\Delta hfq$  strains 24 h after hormogonium induction. RbcL is the large subunit of  
10 RUBISCO and serves as a protein loading control. Depicted are merged images of fluorescence  
11 micrographs acquired using a 63x objective lens from cellular autofluorescence (red) and PilA  
12 immunofluorescence (cyan). **(E)** Lectin staining analysis of HPS. Depicted are merged images of  
13 fluorescence micrographs acquired using a 10x objective lens from cellular autofluorescence (red) and  
14 UEA-fluorescein stained HPS (yellow) 24 h after hormogonium induction. **(F)** Fluorescence micrographs  
15 of the *hfq-gfp* strain at 0 and 24 post hormogonium induction. The upper panel depicts merged images  
16 of fluorescence micrographs acquired using a 63x objective lens from cellular autofluorescence (red) and  
17 GFP fluorescence (cyan). The lower panel depicts quantification of fluorescence intensity derived from  
18 Hfq-GFP for the regions indicated with white rectangles in the upper panel.

19

20 **SMOV1.** Time lapse motility assays of individual filaments from the wild type and  $\Delta hfq$  strains.

21

22

23

24

25

26

27

28

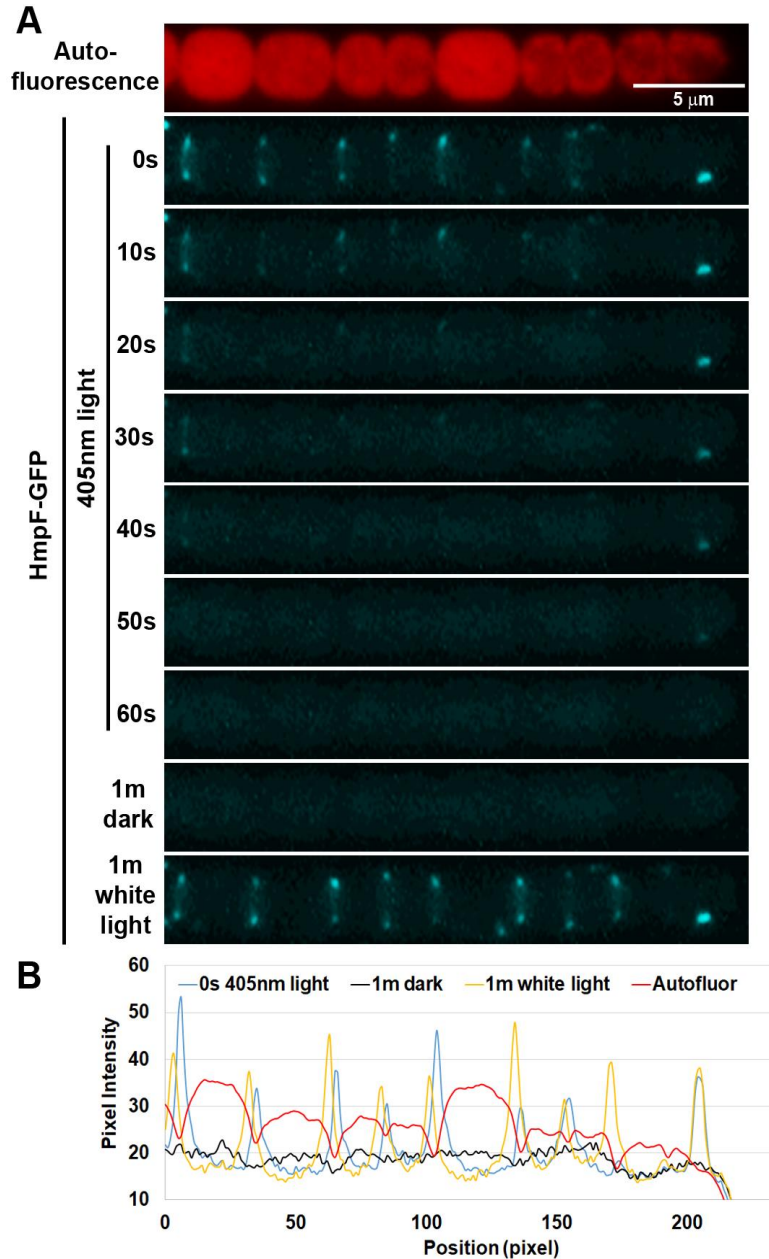

29

30 **Figure S2.** Dynamic localization of HmpF-GFP in response to light in immobilized hormogonium  
 31 filaments. **(A)** Fluorescence micrographs of cellular autofluorescence (red) and GFP fluorescence (cyan)  
 32 of the *hmpF-gfp* strain exposed to a light regimen of 405 nm for 1 min, followed by darkness for 1 min,  
 33 and subsequently incubated in white light for 1 min. **(B)** Quantification of positional fluorescence  
 34 intensity. Using imageJ, a line was drawn along the length of the filament and the pixel intensity was  
 35 measured at the indicated time points in the light regimen. Note the bright fluorescent focus at the far

36 right of the filament (in panel A), which delocalizes, and re-localizes to the same position in the filament,  
37 whereas the bands of polar fluorescence show a positional shift indicating the relocalization of HmpF-  
38 GFP to the opposite pole of the cell.

39

40

41

42

43

44

45

46

47

48

49

50

51

52

53

54

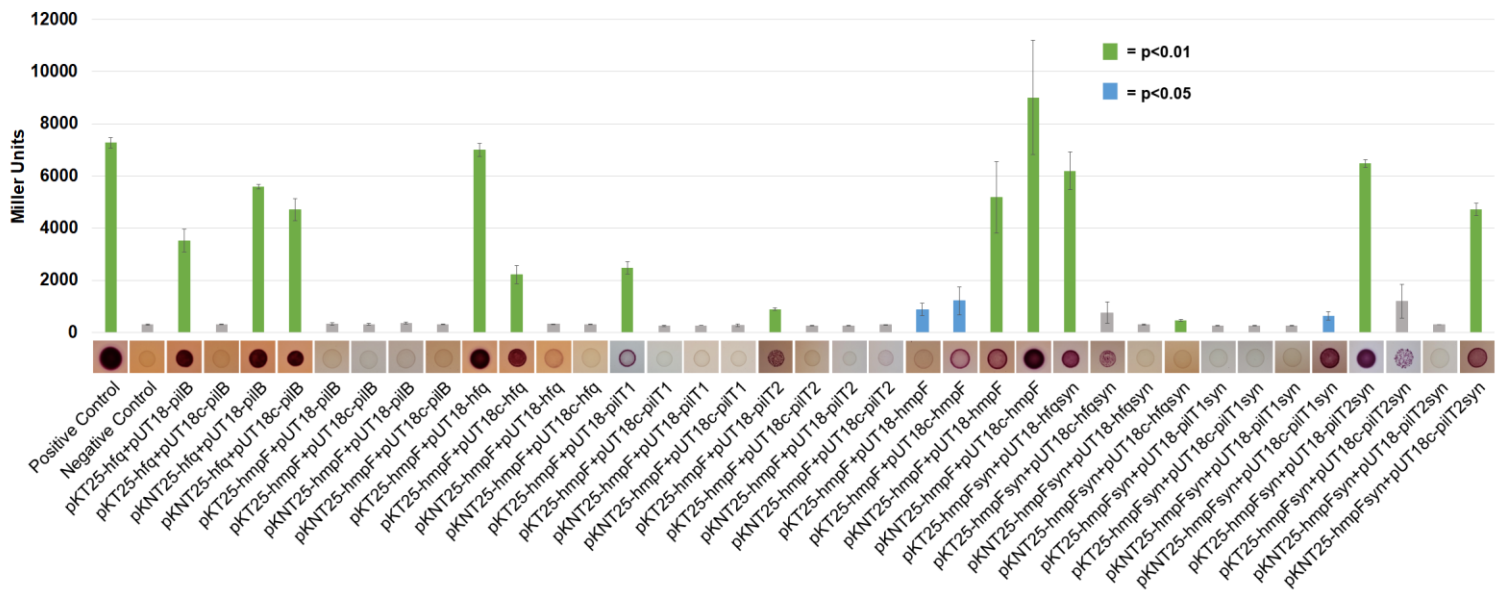

55 **Figure S3.** BACTH analysis between various proteins of *N. punctiforme* and *Synechocystis* sp. strain PCC  
 56 6803. Depicted are the results from qualitative assays on MacConkey agar and quantitative analysis of  $\beta$ -  
 57 galactosidase activity. The positive control strain harbors plasmids pKT25-zip and pUT18c-zip, while the  
 58 negative control strain harbors the empty vectors pKT25 and pUT18c. Error bars = +/- 1 S.D., p-values  
 59 determined by two-tailed Student's t-Test between the negative control and each experimental  
 60 combination of plasmids, n=3.

61  
 62  
 63  
 64  
 65  
 66  
 67

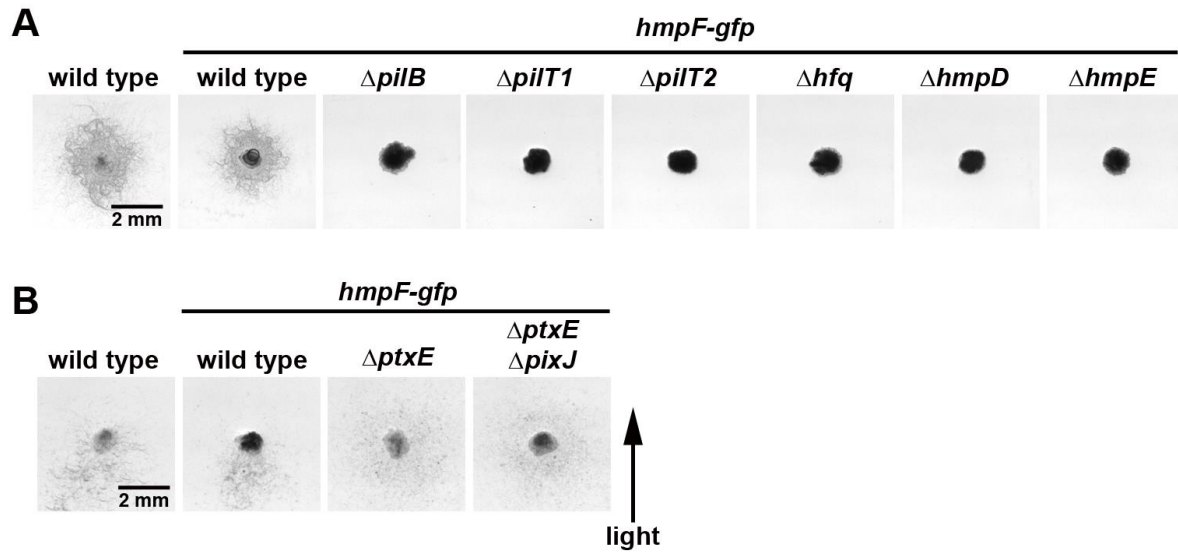

68

69 **Figure S4. (A)** Plate motility and **(B)** phototaxis assays of the wild-type and *hmpF-gfp* strain harboring  
 70 deletions in genes encoding components of the T4P, Hmp, Ptx, and Pix systems. Images were taken at 48  
 71 h (A) or 72 h (B) post hormogonium induction.

72

73

74

75

76

77

78

79

80

81

82

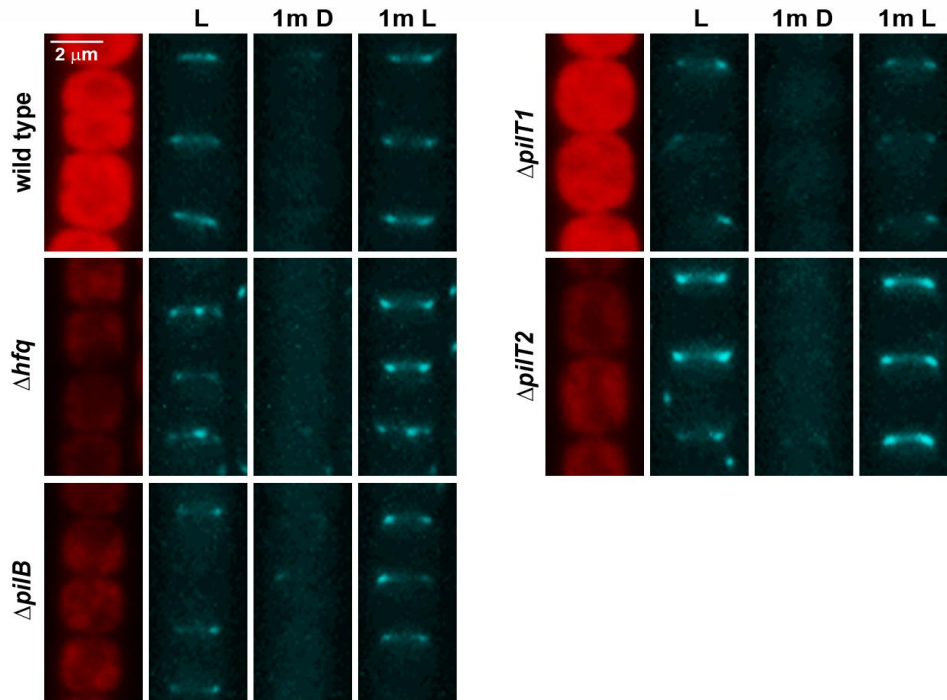

83

84 **Figure S5.** Localization of HmpF-GFP in response to light in strains harboring deletions in genes encoding  
85 components of the T4P system. Depicted are fluorescence micrographs of cellular autofluorescence  
86 (red) and GFP fluorescence (cyan) at each interval of a light regiment with exposure to white light for 1  
87 min (L), followed by darkness for 1 min (1m D), and subsequently white light for 1 min (1m L).

88

89

90

91

92

93

94

95

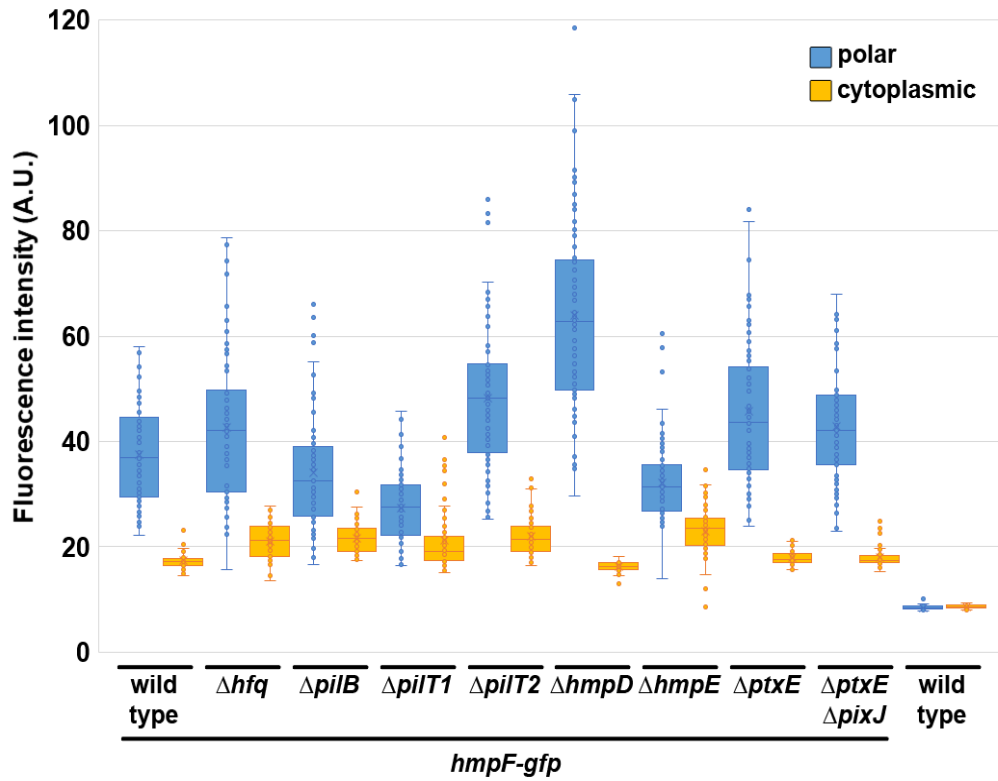

96

97 **Figure S6.** Box plots depicting the quantitative analysis of polar and cytoplasmic fluorescence from  
98 HmpF-GFP in strain harboring deletions in genes encoding components of the T4P, Hmp, Ptx, and Pix  
99 systems.

100

101

102

103



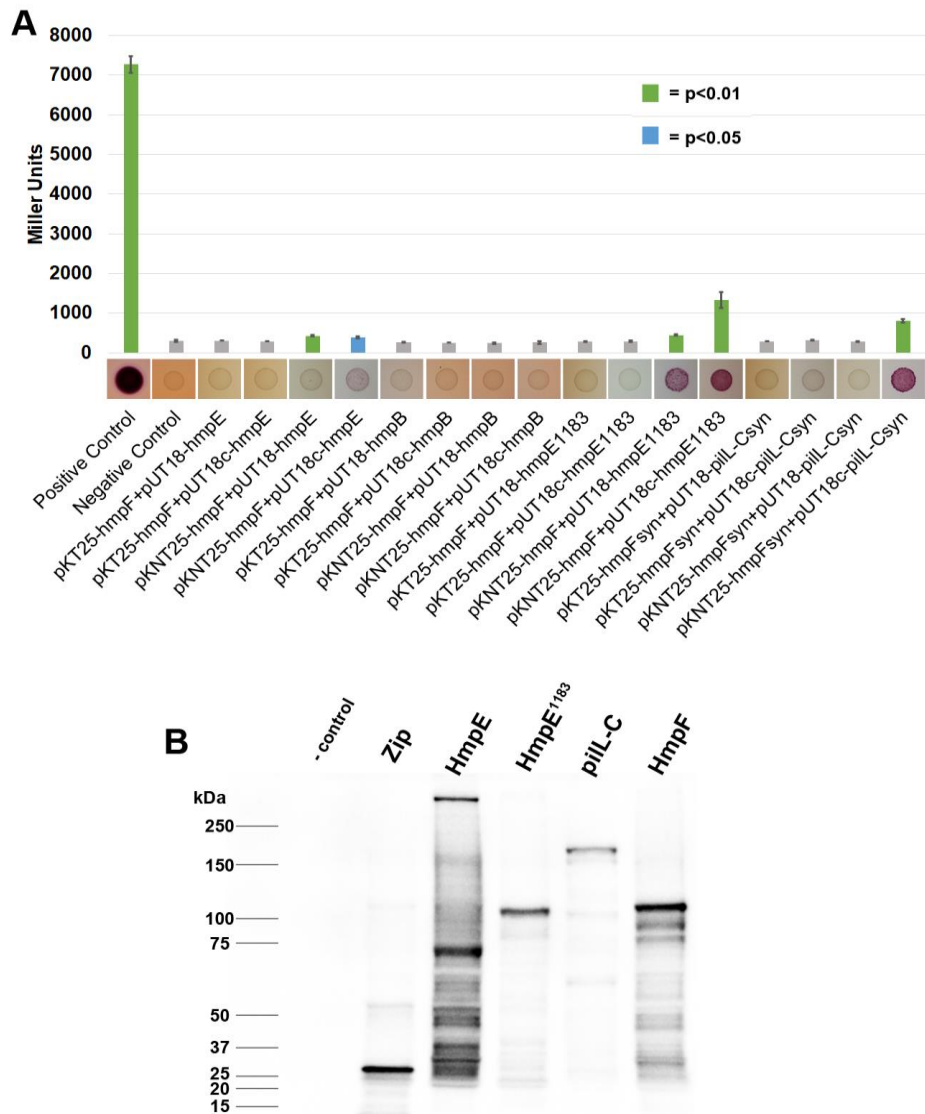

104

105 **Figure S7.** BACTH analysis between various proteins of *N. punctiforme* and *Synechocystis* sp. strain  
 106 PCC6803. **(A)** Depicted are the results from qualitative assays on MacConkey agar and quantitative  
 107 analysis of  $\beta$ -galactosidase activity. The positive control strain harbors plasmids pKT25-zip and pUT18c-  
 108 zip, while the negative control strain harbors the empty vectors pKT25 and pUT18c. Error bars = +/- 1  
 109 S.D. p-values determined by two-tailed Student's t-Test between the negative control and each  
 110 experimental combination of plasmids, n=3. **(B)** Immunoblot analysis of protein expression in *E. coli*  
 111 BL21(DE3) harboring pUT18c plasmids expressing the indicated protein. – control is BL21(DE3) not  
 112 harboring any pUT18c derivatives.

113 **SMOV2.** Time lapse motility assays of individual filaments from the *hmpF-gfp* strain treated with either  
114 CCCP or DMSO alone (- control).

115

116

117

118

119

120

121

122

123

124

125

126

127

128

129

130

131

**Table S1. Strains and plasmids used in this study**

| Strains                           | Relevant Characteristic(s)                                                       | source     |
|-----------------------------------|----------------------------------------------------------------------------------|------------|
| <i>Nostoc punctiforme</i> strains |                                                                                  |            |
| ATCC 29133                        | wild type                                                                        | ATCC       |
| UCD153                            | Laboratory derivative of <i>N. punctiforme</i> ATCC 29133 with reduced motility  | (1)        |
| UCD598                            | $\Delta ptxE$ (Npun_F2165) *                                                     | (2)        |
| TNM703                            | UCD153 with a Tn5-1063 insertion after nucleotide 242 of <i>hfq</i> (Npun_F5230) | This study |
| UOP157                            | <i>hmpF-gfp</i> (Npun_R5959)                                                     | (3)        |
| UOP160                            | $\Delta ptxE, hmpF-gfp$                                                          | This study |
| UOP161                            | $\Delta pilB, hmpF-gfp$                                                          | This study |
| UOP162                            | $\Delta hmpD$ (Npun_F5963), <i>hmpF-gfp</i>                                      | This study |
| UOP163                            | $\Delta pilT1$ (Npun_R0117), <i>hmpF-gfp</i>                                     | This study |
| UOP164                            | $\Delta pilT2$ (Npun_F2507), <i>hmpF-gfp</i>                                     | This study |
| UOP173                            | $\Delta ptxE, \Delta pixJ$ (Npun_R6012), <i>hmpF-gfp</i>                         | This study |
| UOP185                            | $\Delta hfq$                                                                     | This study |
| UOP191                            | $\Delta hmpE$ (Npun_F5964), <i>hmpF-gfp</i>                                      | This study |
| UOP 193                           | <i>hfq-gfp</i>                                                                   | This study |
| UOP200                            | $\Delta hfq, hmpF-gfp$                                                           | This study |
| Plasmids                          |                                                                                  |            |
| pAM504                            | Mobilizable shuttle vector                                                       | (4)        |
| pRL278                            | Mobilizable suicide vector                                                       | (5)        |
| pRL1063a                          | Suicide vector carrying Tn5-1063, a Tn5 derivative transposon                    | (6)        |
| pSCR569                           | Mobilizable suicide vector for C-terminal <i>gfpuv</i> translational fusions     | (7)        |
| pSCR583                           | Suicide vector for in-frame deletion of <i>hmpD</i>                              | (8)        |
| pDDR136                           | Suicide vector for in-frame deletion of <i>hmpE</i>                              | (9)        |
| pDDR293                           | Suicide vector for in-frame deletion of <i>pilT2</i>                             | (10)       |
| pDDR354                           | Suicide vector for in-frame deletion of <i>pilT1</i>                             | (10)       |
| pDDR368                           | Suicide vector for in-frame deletion of <i>pilB</i>                              | (10)       |
| pDDR465                           | Suicide vector for allelic substitution of <i>hmpF</i> with <i>hmpF-gfpuv</i>    | (3)        |
| pDDR476                           | Suicide vector for in-frame deletion of <i>hfq</i> [1-4] †                       | This study |

|         |                                                                                        |            |
|---------|----------------------------------------------------------------------------------------|------------|
| pTVH102 | Suicide vector for in-frame deletion of <i>pixJ</i> [5-8]                              | This study |
| pEZ101  | Suicide vector for allelic substitution of <i>hfq</i> with <i>hfq-gfpuv</i> [5,8,9,10] | This study |
| pEZ102  | Shuttle vector containing <i>hfq</i> and the 241 bp 5' to the start codon [11-12]      | This study |
| pEZ103  | pKT25- <i>hfq</i> [13-14]                                                              | This study |
| pEZ104  | pKNT25- <i>hfq</i> [13-14]                                                             | This study |
| pEZ105  | pUT18- <i>hfq</i> [13-14]                                                              | This study |
| pEZ106  | pUT18c- <i>hfq</i> [13-14]                                                             | This study |
| pEZ109  | pUT18- <i>pilB</i> [15-16]                                                             | This study |
| pEZ110  | pUT18c- <i>pilB</i> [15-16]                                                            | This study |
| pTVH105 | pUT18- <i>hmpF</i> [17-18]                                                             | This study |
| pTVH106 | pUT18c- <i>hmpF</i> [17-18]                                                            | This study |
| pTVH107 | pKT25- <i>hmpF</i> [17-18]                                                             | This study |
| pTVH108 | pKNT25- <i>hmpF</i> [17-18]                                                            | This study |
| pTVH109 | pUT18- <i>hmpE</i> [19-20]                                                             | This study |
| pTVH110 | pUT18c- <i>hmpE</i> [19-20]                                                            | This study |
| pTVH113 | pUT18- <i>hmpE</i> 1183-1865 [20-21]                                                   | This study |
| pTVH114 | pUT18c- <i>hmpE</i> 1183-1865 [20-21]                                                  | This study |
| pDDR480 | pUT18- <i>hfq</i> (ssr3341, <i>Synechocystis sp.</i> strain PCC6803) [22-23]           | This study |
| pDDR481 | pUT18c- <i>hfq</i> (ssr3341, <i>Synechocystis sp.</i> strain PCC6803) [22-23]          | This study |
| pDDR482 | pUT18- <i>pilL-C</i> (slr0322, <i>Synechocystis sp.</i> strain PCC6803) [24-25]        | This study |
| pDDR483 | pUT18c- <i>pilL-C</i> (slr0322, <i>Synechocystis sp.</i> strain PCC6803) [24-25]       | This study |
| pDDR484 | pKT25- <i>hmpF</i> (slr1301, <i>Synechocystis sp.</i> strain PCC6803) [26-27]          | This study |
| pDDR485 | pKNT25- <i>hmpF</i> (slr1301, <i>Synechocystis sp.</i> strain PCC6803) [26-27]         | This study |
| pDDR486 | pUT18- <i>pilT1</i> [28-29]                                                            | This study |
| pDDR487 | pUT18c- <i>pilT1</i> [28-29]                                                           | This study |
| pDDR488 | pUT18- <i>pilT1</i> (slr0161, <i>Synechocystis sp.</i> strain PCC6803) [30-31]         | This study |
| pDDR489 | pUT18c- <i>pilT1</i> (slr0161, <i>Synechocystis sp.</i> strain PCC6803) [30-31]        | This study |
| pDDR490 | pUT18- <i>pilT2</i> [32-33]                                                            | This study |
| pDDR491 | pUT18c- <i>pilT2</i> [32-33]                                                           | This study |
| pDDR492 | pUT18- <i>pilT2</i> (sll1533, <i>Synechocystis sp.</i> strain PCC6803) [34-35]         | This study |
| pDDR493 | pUT18c- <i>pilT2</i> (sll1533, <i>Synechocystis sp.</i> strain PCC6803) [34-35]        | This study |

|         |                                         |            |
|---------|-----------------------------------------|------------|
| pDDR494 | pUT18- <i>hmpB</i> (Npun_F5961) [36-37] | This study |
| pDDR495 | pUT18c- <i>hmpB</i> [36-37]             | This study |

132 \* locus tag and genes derived from *Synechocystis* sp. strain PCC6803 rather than *N. punctiforme* denoted in parentheses  
133 † numbers in brackets correspond to primers used to construct plasmid. Detailed information on primers can be found  
134 in Table S2

135  
136  
137  
138  
139  
140  
141  
142  
143  
144  
145  
146  
147  
148  
149  
150  
151  
152  
153  
154  
155  
156  
157

**Table S2. Oligonucleotides used in this study**

| Oligonucleotide      | Sequence                                 | Number |
|----------------------|------------------------------------------|--------|
| NpF5230-5'-F         | ATATAGGATCCTCGTAGTAAGGACTTTAGTC          | 1      |
| NpF5230-5'-R-new     | CTTGTTTTCGGGGTGTCAAATTCGGTAAGC           | 2      |
| NpF5230-3'-F-new     | GAATTTGACACCCCGAAAACAAGTTAGAAATAG        | 3      |
| NpF5230-3'-R         | ATATAGAGCTCCAGTATTAGGGCAAACGATTC         | 4      |
| NpR6012-5'-F         | ATATAGGATCCCTGATGGTTATCTATCAAAACC        | 5      |
| NpR6012-5'-R         | CTAAAATCTATTTGACCAAAAATGTCATTTGATTAACCTC | 6      |
| NpR6012-3'-F         | CAAATGACATTTTTGGTCAAATAGATTTTAGATTTTGG   | 7      |
| NpR6012-3'-R         | ATATAGAGCTCGTTAACAGCTTCAGCAATAC          | 8      |
| hfq-gfp-SmaI-R       | ATATACCCGGGAAGCTTGTTCGGTTTGATG           | 9      |
| hfq-gfp-3'-F         | ATATAACTAGTAAATAGAATTTTGCTTGCGATCG       | 10     |
| Phfq-BamHI-F         | ATATAGGATCCTGCCGTTTTCTCCAGGTAG           | 11     |
| hfq-SacI-R           | ATATAGAGCTCCTAACTTGTTCGGTTTGATGTATG      | 12     |
| hfq-TH-BamHI-F       | ATATAGGATCCCATGCTTACCGAATTTGACAC         | 13     |
| hfq-TH-KpnI-R        | ATATAGGTACCCGACTTGTTCGGTTTGATGTATG       | 14     |
| pilB-TH-BamHI-F      | ATATAGGATCCCATGACTTACTCGTCACCAC          | 15     |
| pilB-TH-KpnI-R       | ATATAGGTACCCGAAACCGAGATGTCATACAG         | 16     |
| hmpF-TH-BamHI-F      | ATATAGGATCCCGTGCTGTATTTAGCAGAAG          | 17     |
| hmpF-TH-KpnI-R       | ATATAGGTACCCGAGACGCTAATAATTCTGG          | 18     |
| hmpE-TH-BamHI-F      | ATATAGGATCCCATGCTGCCGGAACAACAACAG        | 19     |
| hmpE-TH-SacI-R       | ATATAGAGCTCGGAACATTACTCGTAGTGCTAAC       | 20     |
| hmpE1183-TH-BamHI-F  | ATATAGGATCCCATGGATGAATTTGGTGAAGTGGAG     | 21     |
| hfqsyn-TH-BamHI-F    | ATATAGGATCCCATGAGCAGATTTGATAGC           | 22     |
| hfqsyn-TH-KpnI-R     | ATATAGGTACCCGACGGCGGGGAGTAATGTAG         | 23     |
| pilL-Csyn-TH-BamHI-F | ATATAGGATCCCATGACTAGCGATCCCAATCC         | 24     |
| pilL-Csyn-TH-SacI-R  | ATATAGAGCTCGGCTCGTCTGCACTTAGAGC          | 25     |
| hmpFsyn-TH-XbaI-F    | ATATATCTAGATGTGCTCTATCTGGCTGAAATTAAG     | 26     |
| hmpFsyn-TH-KpnI-R    | ATATAGGTACCCGACCGCCAAACAATAGGGTC         | 27     |
| pilT1-TH-BamHI-F     | ATATAGGATCCCATGGAAATGATGATTGAAGACTTG     | 28     |
| pilT1-TH-KpnI-R      | ATATAGGTACCCGATGTGCTTTGGCAGCCGCAC        | 29     |

|                     |                                   |    |
|---------------------|-----------------------------------|----|
| pilT1syn-TH-BamHI-F | ATATAGGATCCCATGGCTTTGGAATACATGATC | 30 |
| pilT1syn-TH-KpnI-R  | ATATAGGTACCCGACGACGTTTAGCGGCAACC  | 31 |
| pilT2-TH-BamHI-F    | ATATAGGATCCCATGACAGAATCACAGTCTCC  | 32 |
| pilT2-TH-KpnI-R     | ATATAGGTACCCGAACTCTACCTCGGAGAAAC  | 33 |
| pilT2syn-TH-BamHI-F | ATATAGGATCCCATGAACCAACCTCCCCG     | 34 |
| pilT2syn-TH-KpnI-R  | ATATAGGTACCCGGGTTCTGCCCCGCAGTC    | 35 |
| hmpB-TH-BamHI-F     | ATATAGGATCCCATGAGTACAGTTCTGATTGTG | 36 |
| hmpB-TH-KpnI-R      | ATATAGGTACCCGTCCTCGCAGCAGTTGTTTG  | 37 |
| Tn5-seq-F           | CGATGAAGAGCAGAAGTTATC             | 38 |
| Tn5-seq-R           | GGCTCTATTCAGGATAAATC              | 39 |
| Tn5-seq-F-nest      | CGTTACCATGTTAGGAGGTC              | 40 |

158

159

160

161

162

163

164

165

166

167

168

169

170

171

172

173

174

175

176 **Supplemental References**

- 177 1. Campbell EL, Summers ML, Christman H, Martin ME & Meeks JC (2007) Global gene expression  
178 patterns of *Nostoc punctiforme* in steady-state dinitrogen-grown heterocyst-containing cultures and at  
179 single time points during the differentiation of akinetes and hormogonia. *J Bacteriol* 189(14): 5247-5256.
- 180 2. Campbell EL, *et al* (2015) Genetic analysis reveals the identity of the photoreceptor for phototaxis in  
181 hormogonium filaments of *Nostoc punctiforme*. *J Bacteriol* 197(4): 782-791.
- 182 3. Cho YW, *et al* (2017) Dynamic localization of HmpF regulates type IV pilus activity and directional  
183 motility in the filamentous cyanobacterium *Nostoc punctiforme*. *Mol Microbiol* 106(2): 252-265.
- 184 4. Wei TF, Ramasubramanian TS & Golden JW (1994) *Anabaena* sp. strain PCC 7120 *ntcA* gene required  
185 for growth on nitrate and heterocyst development. *J Bacteriol* 176(15): 4473-4482.
- 186 5. Cai YP & Wolk CP (1990) Use of a conditionally lethal gene in *Anabaena* sp. strain PCC 7120 to select  
187 for double recombinants and to entrap insertion sequences. *J Bacteriol* 172(6): 3138-3145.
- 188 6. Wolk CP, Cai Y & Panoff JM (1991) Use of a transposon with luciferase as a reporter to identify  
189 environmentally responsive genes in a cyanobacterium. *Proceedings of the National Academy of*  
190 *Sciences* 88(12): 5355-5359.
- 191 7. Risser DD, Wong FC & Meeks JC (2012) Biased inheritance of the protein PatN frees vegetative cells to  
192 initiate patterned heterocyst differentiation. *Proc Natl Acad Sci U S A* 109(38): 15342-15347.
- 193 8. Risser DD & Meeks JC (2013) Comparative transcriptomics with a motility-deficient mutant leads to  
194 identification of a novel polysaccharide secretion system in *Nostoc punctiforme*. *Mol Microbiol* 87(4):  
195 884-893.
- 196 9. Risser DD, Chew WG & Meeks JC (2014) Genetic characterization of the *hmp* locus, a chemotaxis-like  
197 gene cluster that regulates hormogonium development and motility in *Nostoc punctiforme*. *Mol*  
198 *Microbiol* 92(2): 222-233.
- 199 10. Khayatan B, Meeks JC & Risser DD (2015) Evidence that a modified type IV pilus-like system powers  
200 gliding motility and polysaccharide secretion in filamentous cyanobacteria. *Mol Microbiol* 98(6): 1021-  
201 1036.

202
